# Supplementary material for: Comparative Evaluation the Knowledge of Large Language Models about Response Evaluation Criteria in Solid Tumors?
Source: Research Square preprint supplement (doi:10.21203/rs.3.rs-6122883/v1), 2025-05-07
Supplement: Supplementary file 1 [file 7445a31f96fcc64c36245b83.xlsx]

## Sheet: Sayfa1
MULTIPLE CHOICE QUESTIONS
Number of Question	ChatGPT o1	ChatGPT 4o	Gemini 1.5 Pro	Perplexity Pro	Mistral Large 2	Llama 3.1 405B	Claude 3.5 Sonnet	Claude 3 Opus	Radiologist 1(Y.C.G.)	Radiologist 2(T.C.)
1.	1	1	1	1	1	1	1	1	1	1
2.	1	1	1	1	1	1	1	1	1	1
3.	1	1	1	1	1	1	1	1	1	1
4.	1	1	1	1	1	1	1	1	0	1
5.	1	1	1	0	1	1	1	1	0	1
6.	1	1	1	1	1	1	1	1	1	1
7.	1	1	1	0	1	1	1	1	1	1
8.	1	1	1	1	1	1	1	1	1	1
9.	1	1	1	1	1	0	1	1	1	1
10.	1	1	0	1	1	1	1	1	1	1
11.	1	1	0	1	1	0	1	1	0	0
12.	1	1	1	1	0	1	1	1	1	1
13.	1	1	1	1	1	1	1	1	1	1
14.	1	1	1	1	1	1	1	1	0	0
15.	1	1	1	1	1	1	1	1	1	1
16.	1	1	1	1	1	1	1	1	1	1
17.	0	1	1	1	1	1	1	1	1	0
18.	1	1	1	1	1	1	1	1	1	1
19.	1	1	1	1	1	1	1	1	1	1
20.	1	1	1	0	1	1	1	0	0	0
21.	0	0	1	1	1	1	1	1	1	1
22.	1	1	1	1	1	0	1	1	0	0
23.	1	1	0	1	0	1	1	1	1	1
24.	1	1	1	1	1	1	1	1	1	1
25.	1	1	1	1	1	1	1	1	1	0
26.	1	1	1	0	1	0	1	1	1	1
27.	1	0	0	0	0	1	1	1	0	1
28.	1	1	1	1	1	1	1	0	1	1
29.	0	1	1	1	0	1	1	1	0	0
30.	1	1	0	0	0	1	1	1	0	1
31.	1	1	1	0	1	0	1	1	1	1
32.	1	1	0	0	1	1	1	1	0	1
33.	1	1	1	1	1	1	1	1	1	0
34.	0	0	0	1	0	0	1	1	1	1
35.	1	1	0	0	1	1	1	1	1	1
36.	1	1	0	1	1	0	1	1	0	0
37.	0	0	1	1	0	1	0	1	1	1
38.	1	1	1	1	1	0	1	0	1	1
39.	1	1	1	0	0	1	1	1	0	0
40.	1	1	1	0	1	1	1	1	1	1
41.	0	0	0	1	0	1	1	1	1	1
42.	1	1	1	1	1	1	1	1	1	0
43.	0	0	1	0	0	0	0	0	1	1
44.	1	1	1	1	1	1	1	1	1	1
45.	1	0	0	0	0	0	0	0	0	0
46.	1	1	1	1	1	1	0	0	1	1
47.	1	1	1	1	1	0	1	1	0	1
48.	1	0	0	0	0	0	1	0	1	0
49.	0	0	1	0	0	0	0	0	0	1
50.	1	1	0	0	0	0	1	1	1	0
True: 1, False:0
Prompt: "Act like a professor of radiology who has 30 years of experience in oncological imaging, especially has studies on RECIST 1.1. Give just letter of the most correct choice of multiple choice questions which i’m gonna ask you. Each question have only one correct answer."
CASE-BASED QUESTIONS
Number of Question	ChatGPT o1	ChatGPT 4o	Gemini 1.5 Pro	Perplexity Pro	Mistral Large 2	Llama 3.1 405B	Claude 3.5 Sonnet	Claude 3 Opus	Radiologist 1(Y.C.G.)	Radiologist 2(T.C.)
1.	1	1	1	1	1	1	1	1	1	1
2.	1	1	1	1	1	0	1	1	1	1
3.	1	1	1	0	1	1	1	1	1	1
4.	0	1	1	0	0	1	1	1	1	1
5.	1	1	1	1	1	1	1	1	0	1
6.	1	1	1	1	1	1	0	0	1	0
7.	0	0	0	0	1	0	1	0	1	1
8.	1	1	1	1	1	1	1	1	1	1
9.	1	1	1	1	0	1	1	1	1	1
10.	1	1	1	0	1	1	1	1	1	1
11.	0	1	1	0	1	0	1	1	0	1
12.	0	0	1	1	0	0	1	1	1	1
13.	0	0	1	0	0	1	0	0	0	1
14.	1	1	0	1	1	1	1	1	1	0
15.	0	0	0	0	0	0	0	0	0	1
16.	1	0	0	1	1	1	0	0	1	0
17.	0	1	1	0	0	0	1	1	1	1
18.	1	1	1	1	1	1	1	1	0	0
19.	1	1	1	1	1	1	1	0	1	1
20.	0	0	0	0	1	0	1	0	1	1
21.	1	1	1	1	1	1	1	1	1	0
22.	0	1	1	1	1	0	1	1	1	1
23.	1	1	1	1	1	1	1	1	0	1
24.	1	1	1	1	1	1	0	0	1	1
25.	0	0	0	0	0	1	1	0	1	1
26.	1	1	1	1	1	1	1	1	1	1
27.	1	1	1	1	0	1	1	1	1	1
28.	1	1	1	1	1	1	1	1	0	1
29.	1	0	1	0	1	1	1	1	1	1
30.	1	1	1	0	1	1	1	0	1	0
True: 1, False:0
Prompt: "Act like a professor of radiology who has 30 years of experience in oncological imaging, especially has studies on RECIST 1.1. Give just letter of the most correct choice of multiple choice questions which i’m gonna ask you. Each question have only one correct answer."
