# Supplementary material for: Comparative Evaluation the Knowledge of Large Language Models about Response Evaluation Criteria in Solid Tumors?
Source: Research Square preprint supplement (doi:10.21203/rs.3.rs-6122883/v1), 2025-05-07
Supplement: Supplementary file 2 [file 934f00a062da01110bcbc028.docx]

**MULTIPLE CHOICE QUESTIONS**

1. Which of the following is NOT a RECIST criterion for evaluating tumor response?
   1. Complete Response (CR)
   2. Partial Response (PR)
   3. Stable Disease (SD)
   4. Progressive Disease (PD)
   5. Minor Response (MR)
2. What is the minimum reduction in the sum of the longest diameters of target lesions required for a diagnosis of Partial Response (PR) according to RECIST 1.1?
   1. 10%
   2. 20%
   3. 30%
   4. 40%
   5. 50%
3. Which of the following statements is FALSE regarding the assessment of non-target lesions in RECIST 1.1?
   1. Non-target lesions must be recorded at baseline and followed throughout the study.
   2. New non-target lesions appearing during treatment are considered evidence of Progressive Disease (PD).
   3. Non-target lesions that decrease in size by 30% or more are considered a Partial Response (PR).
   4. Non-target lesions that increase in size by 20% or more are considered Progressive Disease (PD).
   5. Non-target lesions that remain stable are not considered in the overall response assessment.
4. What is the maximum number of target lesions that can be used for RECIST assessment in a given patient?
   1. 2
   2. 5
   3. 10
   4. 15
   5. 20
5. Which of the following imaging modalities is NOT commonly used for RECIST assessment?
   1. Computed Tomography (CT)
   2. Magnetic Resonance Imaging (MRI)
   3. Positron Emission Tomography (PET)
   4. Ultrasound
   5. X-ray
6. What is the term used to describe the situation when a patient has both a reduction in the size of target lesions and the appearance of new non-target lesions?
   1. Mixed Response
   2. Discordant Response
   3. Indeterminate Response
   4. Pseudo-Progression
   5. Hyper-Progression
7. According to RECIST 1.1, what is the minimum follow-up interval required between consecutive tumor assessments?
   1. 1 week
   2. 2 weeks
   3. 4 weeks
   4. 6 weeks
   5. 8 weeks
8. Which of the following is NOT a RECIST criterion for evaluating lymph node response?
   1. Complete Response (CR)
   2. Partial Response (PR)
   3. Stable Disease (SD)
   4. Progressive Disease (PD)
   5. Minor Response (MR)
9. What is the minimum reduction in the short axis diameter of lymph nodes required for a diagnosis of Partial Response (PR) according to RECIST 1.1?
   1. 10%
   2. 20%
   3. 30%
   4. 40%
   5. 50%
10. Which of the following statements is FALSE regarding the assessment of bone lesions in RECIST 1.1?
    1. Bone lesions must be recorded at baseline and followed throughout the study.
    2. New bone lesions appearing during treatment are considered evidence of Progressive Disease (PD).
    3. Bone lesions that decrease in size by 30% or more are considered a Partial Response (PR).
    4. Bone lesions that increase in size by 20% or more are considered Progressive Disease (PD).
    5. Bone lesions that remain stable are not considered in the overall response assessment.
11. What is the maximum number of target bone lesions that can be used for RECIST assessment in a given patient?
    1. 2
    2. 5
    3. 10
    4. 15
    5. 20
12. Which of the following is NOT a RECIST criterion for evaluating soft tissue lesions?
    1. Complete Response (CR)
    2. Partial Response (PR)
    3. Stable Disease (SD)
    4. Progressive Disease (PD)
    5. Minor Response (MR)
13. What is the minimum reduction in the sum of the longest diameters of soft tissue lesions required for a diagnosis of Partial Response (PR) according to RECIST 1.1?
    1. 10%
    2. 20%
    3. 30%
    4. 40%
    5. 50%
14. Which of the following statements is FALSE regarding the assessment of non-target soft tissue lesions in RECIST 1.1?
    1. Non-target soft tissue lesions must be recorded at baseline and followed throughout the study.
    2. New non-target soft tissue lesions appearing during treatment are considered evidence of Progressive Disease (PD).
    3. Non-target soft tissue lesions that decrease in size by 30% or more are considered a Partial Response (PR).
    4. Non-target soft tissue lesions that increase in size by 20% or more are considered Progressive Disease (PD).
    5. Non-target soft tissue lesions that remain stable are not considered in the overall response assessment.
15. What is the maximum number of target soft tissue lesions that can be used for RECIST assessment in a given patient?
    1. 2
    2. 5
    3. 10
    4. 15
    5. 20
16. Which of the following imaging modalities is NOT commonly used for RECIST assessment of soft tissue lesions?
    1. Computed Tomography (CT)
    2. Magnetic Resonance Imaging (MRI)
    3. Positron Emission Tomography (PET)
    4. Ultrasound
    5. X-ray
17. What is the term used to describe the situation when a patient has both a reduction in the size of target lesions and the appearance of new non-target soft tissue lesions?
    1. Mixed Response
    2. Discordant Response
    3. Indeterminate Response
    4. Pseudo-Progression
    5. Hyper-Progression
18. According to RECIST 1.1, what is the minimum follow-up interval required between consecutive tumor assessments for soft tissue lesions?
    1. 1 week
    2. 2 weeks
    3. 4 weeks
    4. 6 weeks
    5. 8 weeks
19. Which of the following is NOT a RECIST criterion for evaluating ascites or pleural effusion?
    1. Complete Response (CR)
    2. Partial Response (PR)
    3. Stable Disease (SD)
    4. Progressive Disease (PD)
    5. Minor Response (MR)
20. What is the definition of Complete Response (CR) for ascites or pleural effusion according to RECIST 1.1?
    1. Complete disappearance of all ascites or pleural effusion
    2. Reduction in the volume of ascites or pleural effusion by 50% or more
    3. Stabilization of the volume of ascites or pleural effusion
    4. Increase in the volume of ascites or pleural effusion by less than 20%
    5. Appearance of new ascites or pleural effusion
21. Which of the following statements is FALSE regarding the assessment of ascites or pleural effusion in RECIST 1.1?
    1. Ascites or pleural effusion must be recorded at baseline and followed throughout the study.
    2. New ascites or pleural effusion appearing during treatment are considered evidence of Progressive Disease (PD).
    3. Ascites or pleural effusion that decreases in volume by 30% or more are considered a Partial Response (PR).
    4. Ascites or pleural effusion that increases in volume by 20% or more are considered Progressive Disease (PD).
    5. Ascites or pleural effusion that remain stable are not considered in the overall response assessment.
22. What is the maximum number of target ascites or pleural effusion sites that can be used for RECIST assessment in a given patient?
    1. 2
    2. 5
    3. 10
    4. 15
    5. 20
23. Which of the following imaging modalities is NOT commonly used for RECIST assessment of ascites or pleural effusion?
    1. Computed Tomography (CT)
    2. Magnetic Resonance Imaging (MRI)
    3. Positron Emission Tomography (PET)
    4. Ultrasound
    5. X-ray
24. What is the term used to describe the situation when a patient has both a reduction in the volume of ascites or pleural effusion and the appearance of new target lesions?
    1. Mixed Response
    2. Discordant Response
    3. Indeterminate Response
    4. Pseudo-Progression
    5. Hyper-Progression
25. According to RECIST 1.1, what is the minimum follow-up interval required between consecutive tumor assessments for ascites or pleural effusion?
    1. 1 week
    2. 2 weeks
    3. 4 weeks
    4. 6 weeks
    5. 8 weeks

26. According to RECIST 1.1, what is the maximum number of lesions that can be assessed for response determination?

a) 2

b) 5

c) 10

d) 15

e) 20

27. What is the minimum short axis measurement for a lymph node to be considered measurable and assessable as a target lesion?

a) 5 mm

b) 10 mm

c) 15 mm

d) 20 mm

e) 25 mm

28. When a target lesion becomes too small to measure on a CT scan, what should be recorded on the case report form?

a) 0 mm

b) 5 mm

c) 10 mm

d) 15 mm

e) 20 mm

29. What is the minimum size for a measurable lesion on a CT scan with a slice thickness of 5 mm or less?

a) 5 mm

b) 10 mm

c) 15 mm

d) 20 mm

e) 25 mm

30. In which of the following scenarios is confirmation of response required?

a) Trials with response as the primary endpoint

b) Randomized studies

c) Phase II trials

d) Phase III trials

e) All of the above

31. How are non-target lesions recorded on the case report form?

a) By measuring their size

b) By indicating their presence or absence

c) By describing their appearance

d) By noting their location

e) By all of the above

32. For a target lesion to meet the criteria for Complete Response (CR), what must happen to any pathological lymph nodes?

a) They must disappear completely.

b) They must reduce in size by at least 30%.

c) They must reduce in short axis to <10 mm.

d) They must increase in size by at least 20%.

e) None of the above

33. What is the minimum percentage increase in the sum of diameters of target lesions required to qualify for Progressive Disease (PD)?

a) 10%

b) 15%

c) 20%

d) 25%

e) 30%

34. In addition to the relative increase for PD, what is the minimum absolute increase required in the sum of diameters?

a) 2 mm

b) 5 mm

c) 10 mm

d) 15 mm

e) 20 mm

35. Which of the following is not considered a measurable lesion according to RECIST 1.1 criteria?

a) Skin nodule with a diameter of 12 mm

b) Lung lesion measuring 18 mm on chest X-ray

c) Blastic bone lesion

d) Lymph node with a short axis of 20 mm

e) All of the above are measurable lesions

36. Which of the following is not a criterion for assessing tumor response in RECIST 1.1?

a) Change in tumor size

b) Change in tumor markers

c) Presence of new lesions

d) Duration of response

e) All of the above are criteria for assessing tumor response

37. What is the minimum follow-up duration required after the end of treatment to assess for complete response?

a) 1 month

b) 3 months

c) 6 months

d) 12 months

e) 24 months

38. Which of the following is not considered unequivocal progression of non-measurable/non-target disease?

a) Appearance of new lesions

b) Increase in the size of non-target lesions

c) Worsening of symptoms

d) Development of malignant ascites

e) All of the above are considered unequivocal progression

39. What is the term used to describe a situation where a patient's disease initially responds to treatment but later progresses?

a) Partial response

b) Stable disease

c) Progressive disease

d) Relapse

e) Remission

40. Which of the following statements is true about RECIST 1.1 criteria?

a) RECIST 1.1 criteria are used to assess response to treatment in patients with solid tumors.

b) RECIST 1.1 criteria are used to assess response to treatment in patients with leukemia.

c) RECIST 1.1 criteria are used to assess response to treatment in patients with brain tumors.

d) RECIST 1.1 criteria are used to assess response to treatment in patients with lymphoma.

e) RECIST 1.1 criteria are used to assess response to treatment in patients with all types of cancer.

41. How is the short axis of a lymph node determined?

a) By measuring the longest diameter of the node

b) By measuring the smallest diameter of the node

c) By measuring the diameter of the node in the axial plane

d) By measuring the diameter of the node in the sagittal plane

e) By measuring the diameter of the node in the coronal plane

42. What is the recommended course of action when unequivocal progression is observed in non-measurable disease?

a) Continue treatment without any changes

b) Consider the patient to have had overall PD

c) Repeat imaging studies to confirm progression

d) Consult with a specialist for further evaluation

e) Discontinue treatment and enroll in a new trial

43. Which of the following is not an example of unequivocal progression in non-measurable disease?

a) Increase in pleural effusion from 'trace' to 'large'

b) Increase in lymphangitic localized to widespread

c) Increase in tumor burden representing an additional 73% increase in 'volume'

d) Increase in skin nodules from 2 to 5

e) Increase in liver metastases from 3 to 7

44. What is the term used to describe a situation where a patient's disease shows no significant change in tumor size after treatment?

a) Complete response

b) Partial response

c) Stable disease

d) Progressive disease

e) Relapse

45. What is the term used to describe a situation where a patient's disease worsens or develops new lesions after an initial response to treatment?

a) Partial response

b) Stable disease

c) Progressive disease

d) Relapse

e) Remission

46. Which of the following is not a criterion for assessing tumor response in RECIST 1.1?

a) Change in tumor size

b) Change in tumor markers

c) Presence of new lesions

d) Duration of response

e) Overall survival

47. What is the recommended method for measuring the size of lung lesions?

a) Chest X-ray

b) CT scan

c) MRI

d) Ultrasound

e) None of the above

48.Which of the following is not considered a measurable lesion according to RECIST 1.1 criteria?

a) Skin nodule with a diameter of 12 mm

b) Lung lesion measuring 18 mm on chest X-ray

c) Blastic bone lesion

d) Lymph node with a short axis of 20 mm

e) All of the above are considered measurable lesions

49. What is the minimum follow-up duration required after the end of treatment to assess for complete response?

a) 1 month

b) 3 months

c) 6 months

d) 12 months

e) 24 months

50. Which of the following is not a type of response defined in RECIST 1.1?

a) Complete response

b) Partial response

c) Stable disease

d) Minimal response

e) All of the above are types of response defined in RECIST 1.1

**ANSWERS**

1. E
2. C
3. C
4. C
5. D
6. A
7. C
8. E
9. B
10. C
11. C
12. E
13. C
14. C
15. C
16. D
17. A
18. C
19. E
20. A
21. C
22. C
23. C
24. A
25. C
26. B
27. C
28. B
29. B
30. A
31. B
32. C
33. C
34. B
35. C
36. B
37. C
38. C
39. D
40. A
41. B
42. B
43. D
44. C
45. C
46. E
47. B
48. E
49. C
50. D
