# Supplementary material for: Comparative Evaluation the Knowledge of Large Language Models about Response Evaluation Criteria in Solid Tumors?
Source: Research Square preprint supplement (doi:10.21203/rs.3.rs-6122883/v1), 2025-05-07
Supplement: Supplementary file 3 [file f583f44d8b76c9c60b4eeb9c.docx]

**CASE-BASED QUESTIONS**

1. A 50-year-old male patient presents with acute myeloid leukemia (AML). Bone marrow biopsy reveals 80% blasts. The patient is started on induction chemotherapy.

MCQ: Can RECIST 1.1 criteria be used to assess the response to treatment in this patient?

a) Yes

b) No

c) Only for lymph node involvement

d) Only for bone involvement

e) None of the above

1. A 60-year-old female patient presents with a 5 cm GIST in the stomach. The patient undergoes surgical resection of the tumor.

MCQ: Can RECIST 1.1 criteria be used to assess the response to treatment in this patient?

a) Yes

b) No

c) Only for lymph node involvement

d) Only for distant metastasis

e) None of the above

1. A 40-year-old male patient presents with a 2 cm glioblastoma in the right frontal lobe. The patient undergoes surgical resection of the tumor followed by radiation therapy.

MCQ: Can RECIST 1.1 criteria be used to assess the response to treatment in this patient?

a) Yes

b) No

c) Only for main lesion

d) Only for distant metastasis

e) None of the above

1. A 50-year-old male patient with metastatic melanoma has multiple lung lesions. The largest lesion measures 2.5 cm in diameter on baseline CT scan. After 2 months of treatment, the largest lesion measures 1.8 cm in diameter.

MCQ: What is the best response to treatment according to RECIST 1.1 criteria?

a) Complete response

b) Partial response

c) Stable disease

d) Progressive disease

e) Unequivocal progression

1. A 45-year-old female patient with breast cancer has a 3 cm lymph node in the axilla. After 4 cycles of chemotherapy, the lymph node measures 1.5 cm in diameter.

MCQ: What is the best response to treatment according to RECIST 1.1 criteria?

a) Complete response

b) Partial response

c) Stable disease

d) Progressive disease

e) Unequivocal progression

1. A 60-year-old male patient with prostate cancer has multiple bone lesions. The largest lesion measures 1.5 cm in diameter on baseline bone scan. After 6 months of hormone therapy, the largest lesion measures 1.2 cm in diameter.

MCQ: What is the best response to treatment according to RECIST 1.1 criteria?

a) Complete response

b) Partial response

c) Stable disease

d) Progressive disease

e) Unequivocal progression

1. A 30-year-old female patient with Hodgkin lymphoma has multiple lymph nodes in the neck. The largest lymph node measures 3 cm in diameter on baseline CT scan. After 4 cycles of chemotherapy, the largest lymph node measures 2.7 cm in diameter.

MCQ: What is the best response to treatment according to RECIST 1.1 criteria?

a) Complete response

b) Partial response

c) Stable disease

d) Progressive disease

e) Unequivocal progression

1. A 70-year-old male patient with lung cancer has a 4 cm lung lesion. After 3 cycles of chemotherapy, the lesion has completely disappeared on CT scan.

MCQ: What is the best response to treatment according to RECIST 1.1 criteria?

a) Complete response

b) Partial response

c) Stable disease

d) Progressive disease

e) Unequivocal progression

1. A 50-year-old male patient with metastatic melanoma has multiple lung lesions. The largest lesion measures 2.5 cm in diameter on baseline CT scan. After 2 months of treatment, the largest lesion measures 3 cm in diameter.

MCQ: What is the best response to treatment according to RECIST 1.1 criteria?

a) Complete response

b) Partial response

c) Stable disease

d) Progressive disease

e) Unequivocal progression

1. A 45-year-old female patient with breast cancer has a 3 cm lymph node in the axilla. After 4 cycles of chemotherapy, the lymph node measures 4 cm in diameter.

MCQ: What is the best response to treatment according to RECIST 1.1 criteria?

a) Complete response

b) Partial response

c) Stable disease

d) Progressive disease

e) Unequivocal progression

1. A 50-year-old male patient with metastatic melanoma has multiple lung lesions. The largest lesion measures 2.5 cm in diameter and the second largest lesion measures 2 cm in diameter.

MCQ: Which lesion should be selected as the target lesion?

a) The largest lesion

b) The second largest lesion

c) Both lesions

d) Neither lesion

e) None of the above

1. A 45-year-old female patient with breast cancer has a 3 cm lymph node in the axilla and a 2 cm lymph node in the supraclavicular fossa.

MCQ: Which lymph node should be selected as the target lesion?

a) The lymph node in the axilla

b) The lymph node in the supraclavicular fossa

c) Both lymph nodes

d) Neither lymph node

e) None of the above

1. A 60-year-old male patient with prostate cancer has multiple bone lesions. The largest lesion measures 1.5 cm in diameter and the second largest lesion measures 1.2 cm in diameter.

MCQ: Which lesion should be selected as the target lesion?

a) The largest lesion

b) The second largest lesion

c) Both lesions

d) Neither lesion

e) None of the above

1. A 50-year-old male patient with metastatic melanoma has multiple lung lesions. The largest lesion measures 2.5 cm in diameter, the second largest lesion measures 2 cm in diameter, and the third largest lesion measures 1.5 cm in diameter.

MCQ: How many target lesions should be selected?

a) One

b) Two

c) Three

d) Four

e) Five

1. A 45-year-old female patient with breast cancer has a 3 cm lymph node in the axilla, a 2 cm lymph node in the supraclavicular fossa, and a 1 cm lymph node in the internal mammary chain.

MCQ: How many target lesions should be selected?

a) One

b) Two

c) Three

d) Four

e) Five

1. A 60-year-old male patient with prostate cancer has multiple bone lesions. The largest lesion measures 1.5 cm in diameter, the second largest lesion measures 1.2 cm in diameter, and the third largest lesion measures 1 cm in diameter.

MCQ: How many target lesions should be selected?

a) One

b) Two

c) Three

d) Four

e) Five

1. A 50-year-old male patient with metastatic melanoma has multiple lymph nodes in the neck. The largest lymph node measures 2.5 cm in diameter on baseline CT scan. After 2 months of treatment, the largest lymph node measures 1.8 cm in diameter.

MCQ: What is the best response to treatment according to RECIST 1.1 criteria?

a) Complete response

b) Partial response

c) Stable disease

d) Progressive disease

e) Unequivocal progression

1. A 45-year-old female patient with breast cancer has a 3 cm lymph node in the axilla. After 4 cycles of chemotherapy, the lymph node measures 1.5 cm in diameter.

MCQ: What is the best response to treatment according to RECIST 1.1 criteria?

a) Complete response

b) Partial response

c) Stable disease

d) Progressive disease

e) Unequivocal progression

1. A 60-year-old male patient with prostate cancer has multiple lymph nodes in the mediastinum. The largest lymph node measures 1.5 cm in diameter on baseline CT scan. After 6 months of hormone therapy, the largest lymph node measures 1.2 cm in diameter.

MCQ: What is the best response to treatment according to RECIST 1.1 criteria?

a) Complete response

b) Partial response

c) Stable disease

d) Progressive disease

e) Unequivocal progression

1. A 30-year-old female patient with Hodgkin lymphoma has multiple lymph nodes in the neck. The largest lymph node measures 3 cm in diameter on baseline CT scan. After 4 cycles of chemotherapy, the largest lymph node measures 2.7 cm in diameter.

MCQ: What is the best response to treatment according to RECIST 1.1 criteria?

a) Complete response

b) Partial response

c) Stable disease

d) Progressive disease

e) Unequivocal progression

1. A 70-year-old male patient with lung cancer has a 4 cm lymph node in the mediastinum. After 3 cycles of chemotherapy, the lymph node has completely disappeared on CT scan.

MCQ: What is the best response to treatment according to RECIST 1.1 criteria?

a) Complete response

b) Partial response

c) Stable disease

d) Progressive disease

e) Unequivocal progression

1. A 50-year-old male patient with metastatic melanoma has multiple lung lesions. The largest lesion measures 2.5 cm in diameter on baseline CT scan. After 2 months of treatment, the largest lesion measures 1.8 cm in diameter.

MCQ: What is the best response to treatment according to RECIST 1.1 criteria?

a) Complete response

b) Partial response

c) Stable disease

d) Progressive disease

e) Unequivocal progression

1. A 45-year-old female patient with breast cancer has a 3 cm lymph node in the axilla. After 4 cycles of chemotherapy, the lymph node measures 1.5 cm in diameter.

MCQ: What is the best response to treatment according to RECIST 1.1 criteria?

a) Complete response

b) Partial response

c) Stable disease

d) Progressive disease

e) Unequivocal progression

1. A 60-year-old male patient with prostate cancer has multiple bone lesions. The largest lesion measures 1.5 cm in diameter on baseline bone scan. After 6 months of hormone therapy, the largest lesion measures 1.2 cm in diameter.

MCQ: What is the best response to treatment according to RECIST 1.1 criteria?

a) Complete response

b) Partial response

c) Stable disease

d) Progressive disease

e) Unequivocal progression

1. A 30-year-old female patient with Hodgkin lymphoma has multiple lymph nodes in the neck. The largest lymph node measures 3 cm in diameter on baseline CT scan. After 4 cycles of chemotherapy, the largest lymph node measures 2.7 cm in diameter.

MCQ: What is the best response to treatment according to RECIST 1.1 criteria?

a) Complete response

b) Partial response

c) Stable disease

d) Progressive disease

e) Unequivocal progression

1. A 70-year-old male patient with lung cancer has a 4 cm lung lesion. After 3 cycles of chemotherapy, the lesion has completely disappeared on CT scan.

MCQ: What is the best response to treatment according to RECIST 1.1 criteria?

a) Complete response

b) Partial response

c) Stable disease

d) Progressive disease

e) Unequivocal progression

1. A 50-year-old male patient with metastatic melanoma has a new lesion in the liver that was not present on baseline imaging. The new lesion measures 1 cm in diameter.

MCQ: How should the new lesion be classified according to RECIST 1.1 criteria?

a) Target lesion

b) Non-target lesion

c) Unequivocal progression

d) Indeterminate

e) None of the above

1. A 45-year-old female patient with breast cancer has a new lymph node in the axilla that was not present on baseline imaging. The new lymph node measures 1.5 cm in diameter.

MCQ: How should the new lymph node be classified according to RECIST 1.1 criteria?

a) Target lesion

b) Non-target lesion

c) Unequivocal progression

d) Indeterminate

e) None of the above

1. A 60-year-old male patient with prostate cancer has a new bone lesion that was not present on baseline imaging. The new bone lesion measures 2 cm in diameter.

MCQ: How should the new bone lesion be classified according to RECIST 1.1 criteria?

a) Target lesion

b) Non-target lesion

c) Unequivocal progression

d) Indeterminate

e) None of the above

1. A 50-year-old male patient with metastatic melanoma has multiple lymph nodes in the neck. The largest lymph node measures 2.5 cm in diameter on baseline CT scan. After 2 months of treatment, the largest lymph node measures 1.8 cm in diameter, but a new lymph node measuring 1.5 cm in diameter has appeared in the supraclavicular fossa.

MCQ: What is the best response to treatment according to RECIST 1.1 criteria?

a) Complete response

b) Partial response

c) Stable disease

d) Progressive disease

e) Unequivocal progression

**ANSWERS**

1. B
2. B
3. B
4. B
5. B
6. C
7. D
8. A
9. D
10. D
11. A
12. A
13. A
14. B
15. C
16. B
17. B
18. B
19. C
20. D
21. A
22. B
23. B
24. C
25. D
26. A
27. C
28. C
29. C
30. D
